# Supplementary material for: Revealing an unexpectedly low electron injection threshold via reinforced shock acceleration
Source: Springer Nature journal article supplement (doi:10.1038/s41467-024-55641-9), 2025-01-13
Supplement: MOESM3 [file 41467_2024_55641_MOESM3_ESM.xlsx]

## Sheet: Figure 2i
PA [Deg]	F [#/cm^2 s sr keV]	SD (F)
8.1818	18.7395	6.1188
24.5454	18.5083	5.9248
40.909	17.2547	3.8241
57.2726	22.7083	4.4808
73.6362	25.9556	4.1741
89.9998	27.4311	3.8531
106.363	26.2261	2.3218
122.727	26.6572	3.283
139.091	25.3131	1.83
155.454	22.2847	3.0533
171.818	20.1438	6.7852

## Sheet: Figure 3
	Max Flux Ratio	SD (Max Flux Ratio)	Vsw [km/s]
seed (blue)	3.6507	0.7359	604.081
	3.5202	0.6447	513.322
	4.7163	1.2968	621.764
	2.4117	0.3181	482.49
	2.4775	0.437	616.343
	3.1651	0.6404	617.61
non-seed (red)	1.3149	0.1247	338.861
	1.24	0.0792	465.487
	1.1824	0.0704	470.444
	1.3123	0.1119	426.712
	1.3322	0.109	284.47
	1.3716	0.1234	353.471
